# Supplementary material for: Retinal guanylyl cyclase activating protein 1 forms a functional dimer
Source: PubMed Central journal article supplement (PMC5841803; doi:10.1371/journal.pone.0193947), 2018-03-07

**S1 Figure. Cluster Analysis of HADDOCK Docking Calculation.** HADDOCK z-score plotted against i-RMSD for (A) symmetric dimer and (B) asymmetric dimer. The cluster with the lowest i-RMSD was chosen for analysis and described in Table 1.

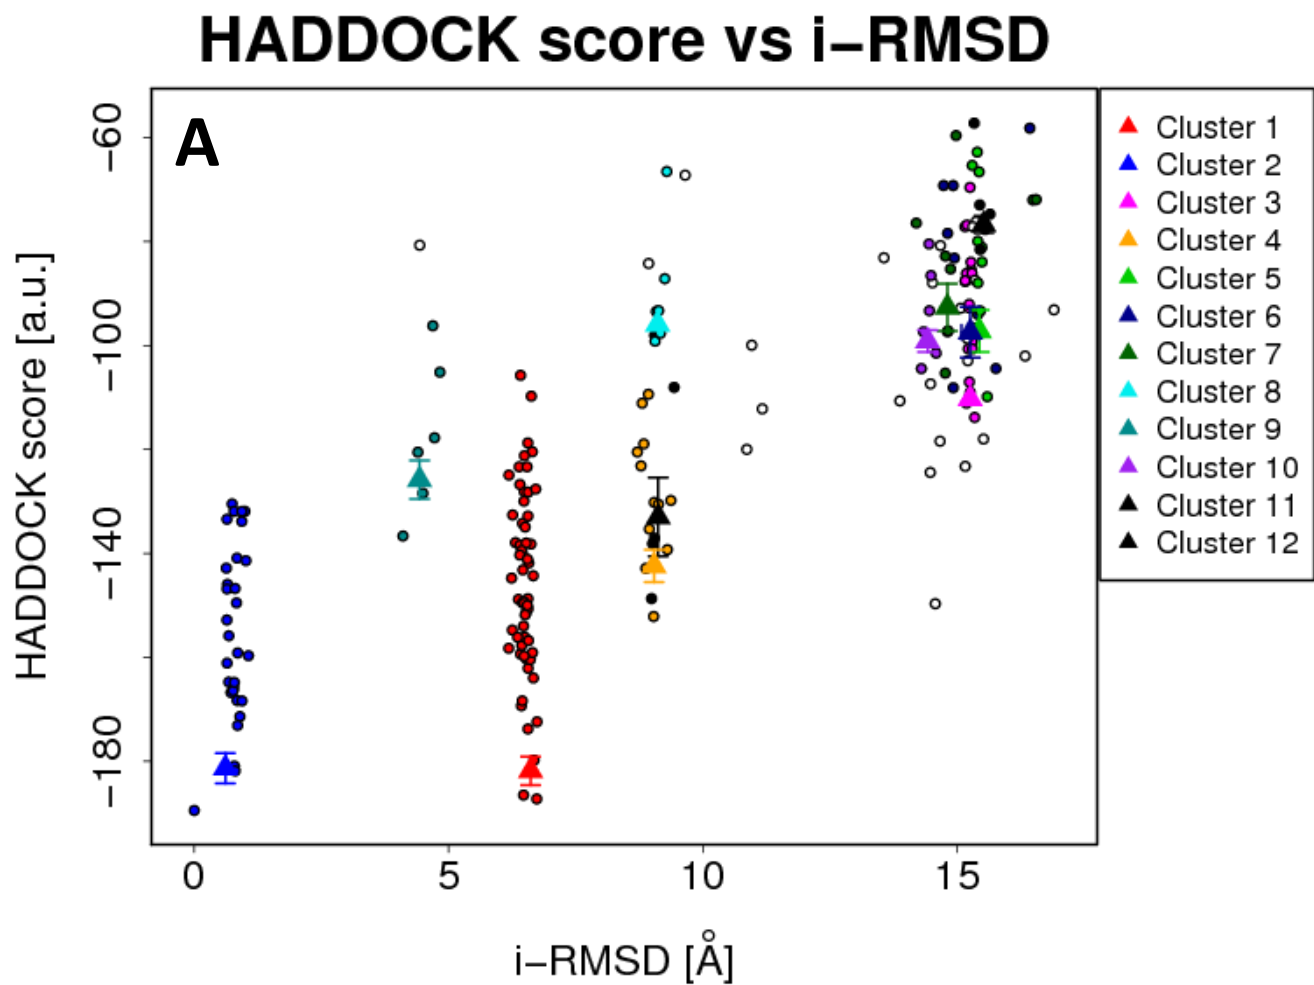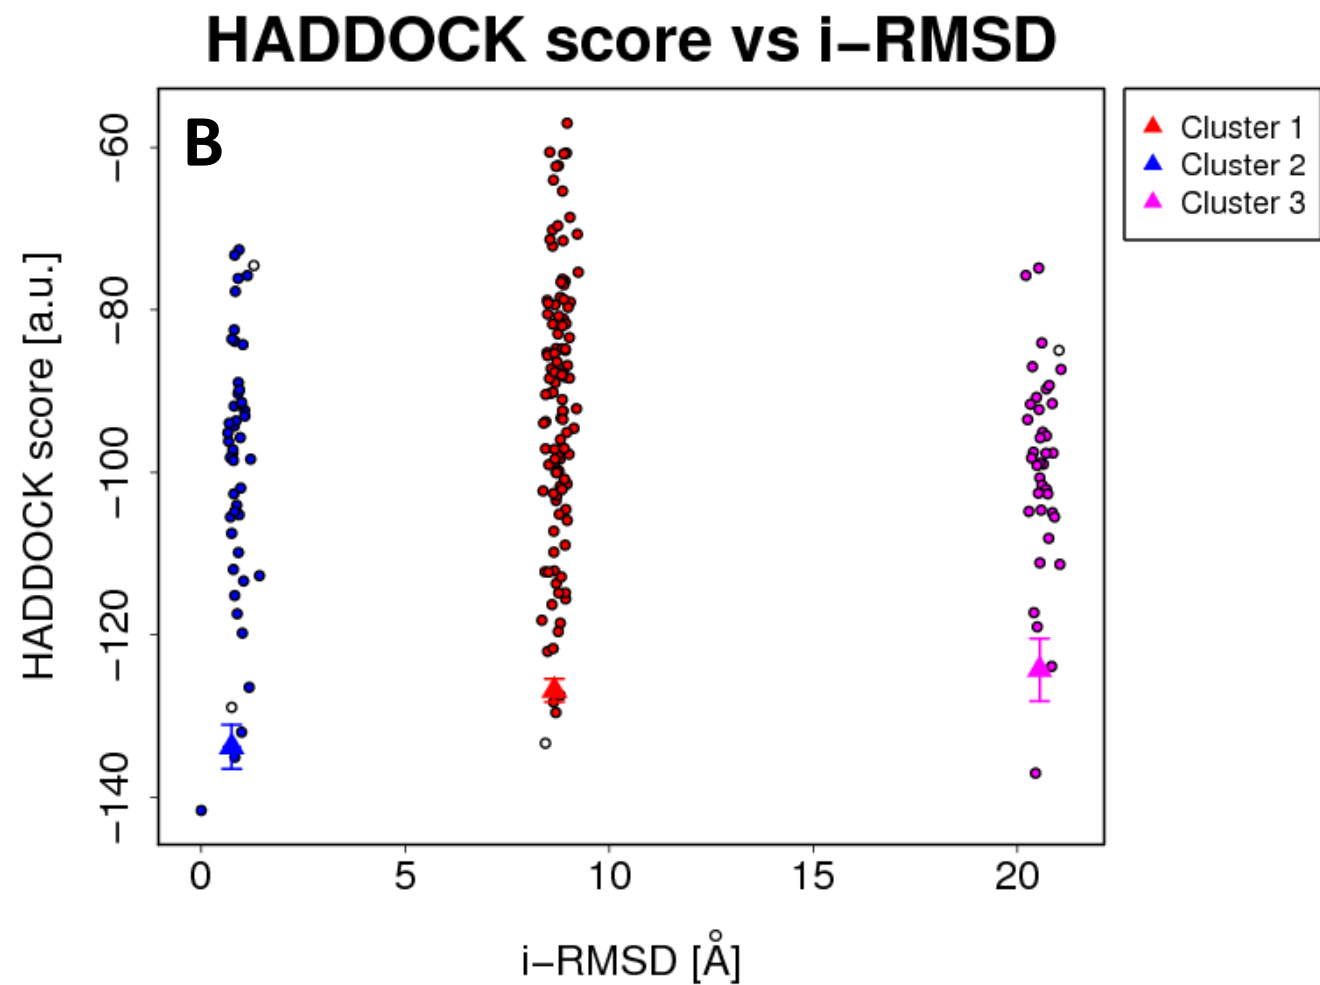

Supplement: pone.0193947.s001.pdf [file pone.0193947.s001.pdf]
